# Supplementary material for: Evaluation of the Resilience of the Catering Industry in Hong Kong before and after the COVID-19 Outbreak Based on Point-of-Interest Data
Source: MDPI journal article supplement (doi:10.3390/ijgi12110443), 2023-10-27
Supplement: s1 [file s1]

**Table S1.** Result of two regression models in 500 m × 500 m

| Variables                                 | Model results (coefficients and significance) |                                          |
|-------------------------------------------|-----------------------------------------------|------------------------------------------|
|                                           | Model 1<br>(Resilience in June 2020)          | Model 2<br>(Resilience in December 2020) |
| <b>COVID-19</b>                           |                                               |                                          |
| Case number                               | 0.029                                         | 0.010 **                                 |
| <b>Population characteristics</b>         |                                               |                                          |
| Elder density                             | 0.107                                         | -0.056                                   |
| <b>Urban built environment components</b> |                                               |                                          |
| Accessibility                             |                                               |                                          |
| Road density                              | 0.193 ***                                     | 0.160                                    |
| MTR station number                        | 0.027                                         | 0.034 *                                  |
| Land Use characteristics                  |                                               |                                          |
| Land use index                            | 1.047 ***                                     | 0.803 ***                                |
| Building coverage ratio                   | 0.544 ***                                     | 0.592 ***                                |
| Private residential                       | -0.067                                        | -0.018                                   |
| Public residential                        | 0.166 ***                                     | 0.191 ***                                |
| Rural Settlement                          | -0.106 **                                     | -0.097 ***                               |
| Agglomeration                             |                                               |                                          |
| Commercial area                           | 0.044                                         | -0.028                                   |
| Shopping Mall number                      | 0.175 ***                                     | 0.124 ***                                |
| Market number                             | 0.303 **                                      | 0.423 ***                                |
| Amenity                                   |                                               |                                          |
| Hospital number                           | -0.290                                        | -0.389 **                                |
| Park number                               | 0.091                                         | 0.175 *                                  |
| Intercept                                 | 1.496 ***                                     | 0.630 ***                                |
| Observations                              | 496                                           | 793                                      |
| Adjusted R-squared                        | 0.520                                         | 0.555                                    |
| Moran's I for residuals                   | 0.047                                         | 0.038                                    |

Note: \* p<0.10. \*\* p<0.05. \*\*\* p<0.01.

**Table S2.** Robustness test results for two regression models in 1 km × 1 km using the bootstrap percentile method.

| Variables                                 | 95% confidence interval              |                                          |
|-------------------------------------------|--------------------------------------|------------------------------------------|
|                                           | Model 1<br>(Resilience in June 2020) | Model 2<br>(Resilience in December 2020) |
| <b>COVID-19</b>                           |                                      |                                          |
| Case number                               | (-0.0543, 0.0662 )                   | (-0.0058, 0.0084 )                       |
| <b>Population characteristics</b>         |                                      |                                          |
| Elder density                             | (-0.1614, 0.1966 )                   | (-0.2687, 0.1529 )                       |
| <b>Urban built environment components</b> |                                      |                                          |
| Accessibility                             |                                      |                                          |
| Road density                              | (-0.1331, 0.1206 )                   | (-0.0644, 0.1037 )                       |
| MTR station number                        | ( 0.0118, 0.0874 )                   | (-0.0155, 0.0686 )                       |
| Land Use characteristics                  |                                      |                                          |
| Land use index                            | ( 0.518, 2.458 )                     | ( 0.478, 1.849 )                         |
| Building coverage ratio                   | ( 0.3218, 0.8624 )                   | ( 0.4163, 0.8503 )                       |

|                      |                           |                           |
|----------------------|---------------------------|---------------------------|
| Private residential  | (-0.1656, 0.1078 )        | (-0.0659, 0.1652 )        |
| Public residential   | <b>( 0.0938, 0.3922 )</b> | <b>( 0.2570, 0.5766 )</b> |
| Rural Settlement     | (-0.2250, 0.0643 )        | (-0.1984, 0.0434 )        |
| Agglomeration        |                           |                           |
| Commercial area      | (-0.2691, 0.1615 )        | (-0.0737, 0.1892 )        |
| Shopping Mall number | <b>( 0.0004, 0.1769 )</b> | (-0.0230, 0.1559 )        |
| Market number        | <b>( 0.0173, 0.4876 )</b> | <b>( 0.0253, 0.4661 )</b> |
| Amenity              |                           |                           |
| Hospital number      | (-0.2223, 0.4277 )        | (-0.4569, 0.0340 )        |
| Park number          | (-0.0543, 0.0662 )        | (-0.1015, 0.2151 )        |
| Intercept            | <b>( 0.449, 1.810 )</b>   | ( 0.0885, 1.0782 )        |

**Table S3.** Robustness test results for two regression models in 500 m × 500 m using the bootstrap percentile method.

| Variables                                 | 95% confidence interval              |                                          |
|-------------------------------------------|--------------------------------------|------------------------------------------|
|                                           | Model 1<br>(Resilience in June 2020) | Model 2<br>(Resilience in December 2020) |
| <b>COVID-19</b>                           |                                      |                                          |
| Case number                               | (-0.0367, 0.1041 )                   | (-0.0020, 0.0259 )                       |
| <b>Population characteristics</b>         |                                      |                                          |
| Elder density                             | (-0.0242, 0.2529 )                   | (-0.2355, 0.2575 )                       |
| <b>Urban built environment components</b> |                                      |                                          |
| Accessibility                             |                                      |                                          |
| Road density                              | <b>( 0.0503, 0.3260 )</b>            | <b>( 0.0536, 0.2997 )</b>                |
| MTR station number                        | <b>(-0.0181, 0.0860 )</b>            | (-0.0199, 0.0927 )                       |
| Land Use characteristics                  |                                      |                                          |
| Land use index                            | <b>( 0.434, 1.677 )</b>              | <b>( 0.2806, 1.1950 )</b>                |
| Building coverage ratio                   | <b>( 0.3981, 0.6883 )</b>            | <b>( 0.4295, 0.7099 )</b>                |
| Private residential                       | (-0.1702, 0.0335 )                   | (-0.1234, 0.0600 )                       |
| Public residential                        | <b>( 0.0551, 0.2723 )</b>            | <b>( 0.0285, 0.2890 )</b>                |
| Rural Settlement                          | (-0.2183, 0.0098 )                   | <b>(-0.1641, -0.0021 )</b>               |
| Agglomeration                             |                                      |                                          |
| Commercial area                           | (-0.0452, 0.1531 )                   | (-0.0926, 0.0580 )                       |
| Shopping Mall number                      | <b>( 0.0865, 0.2853 )</b>            | <b>( 0.0355, 0.2232 )</b>                |
| Market number                             | <b>( 0.0762, 0.5570 )</b>            | <b>( 0.1883, 0.6204 )</b>                |
| Amenity                                   |                                      |                                          |
| Hospital number                           | (-0.7825, 0.2456 )                   | <b>(-0.7302, -0.0129 )</b>               |
| Park number                               | (-0.1011, 0.3254 )                   | (-0.0148, 0.3620 )                       |
| Intercept                                 | <b>( 1.060, 1.949 )</b>              | <b>( 0.3373, 1.0034 )</b>                |
